# Supplementary material for: Characterization of the <em>Common japonica</em>-Originated Genomic Regions in the High Yielding Varieties Developed from Inter-Subspecific Crosses in Rice (<em>Oryza sativa</em> L.)
Source: Preprints.org preprint supplement (doi:10.20944/preprints202004.0428.v1), 2020-04-24

**Figure S1.** Pedigrees of eight HYVs used in this study. (A) Tongil, (B) Minghui 63, (C) Cheongcheongbyeo, (D) Milyang 23, (E) Nampungbyeo, (F) Hanareumbyeo, (G) Dasanbyeo, (H) Takanari

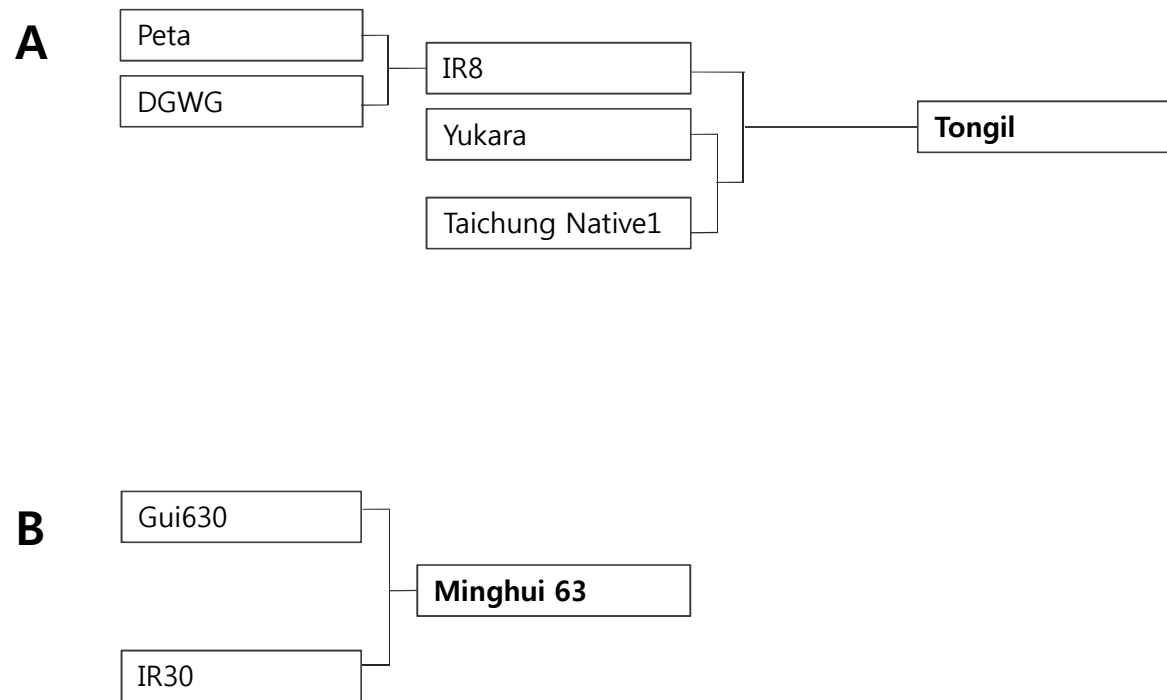

**C**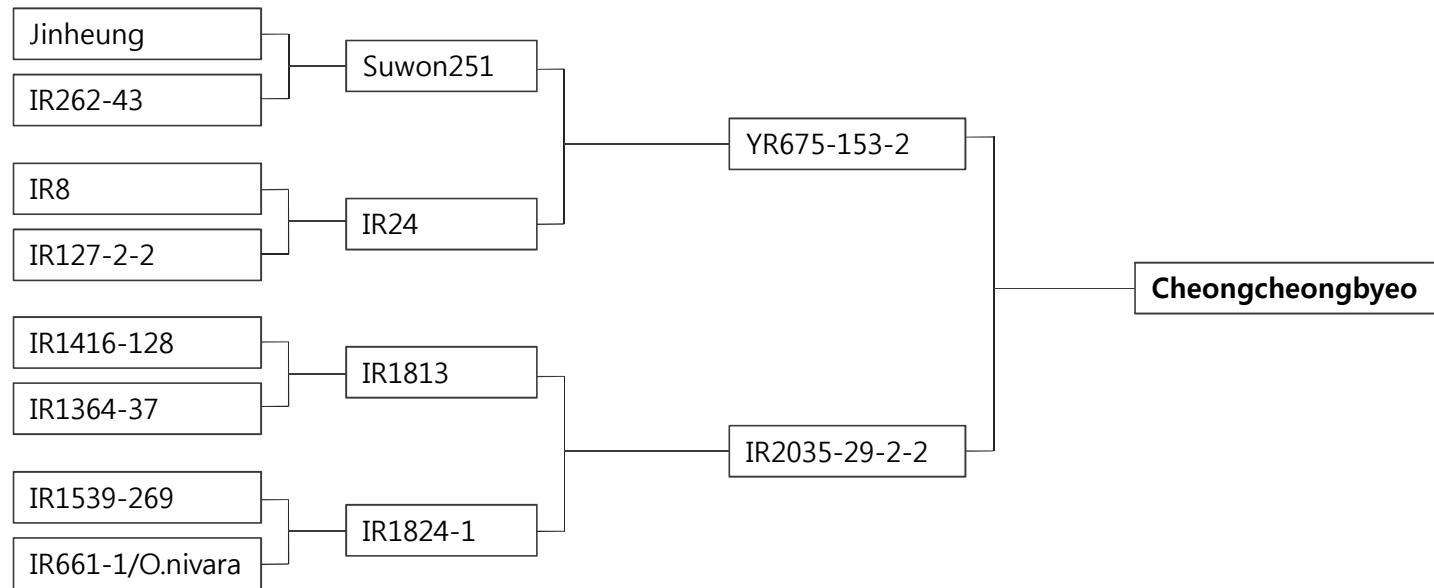**D**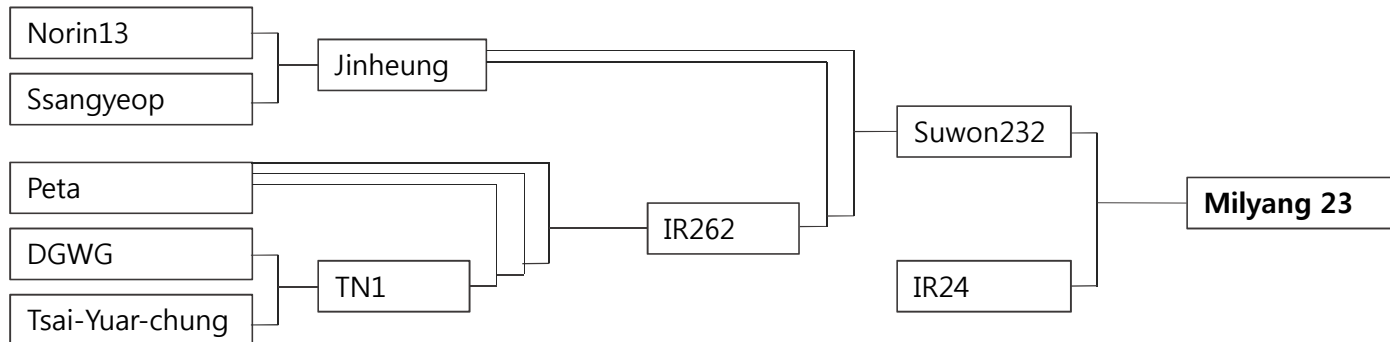

# E

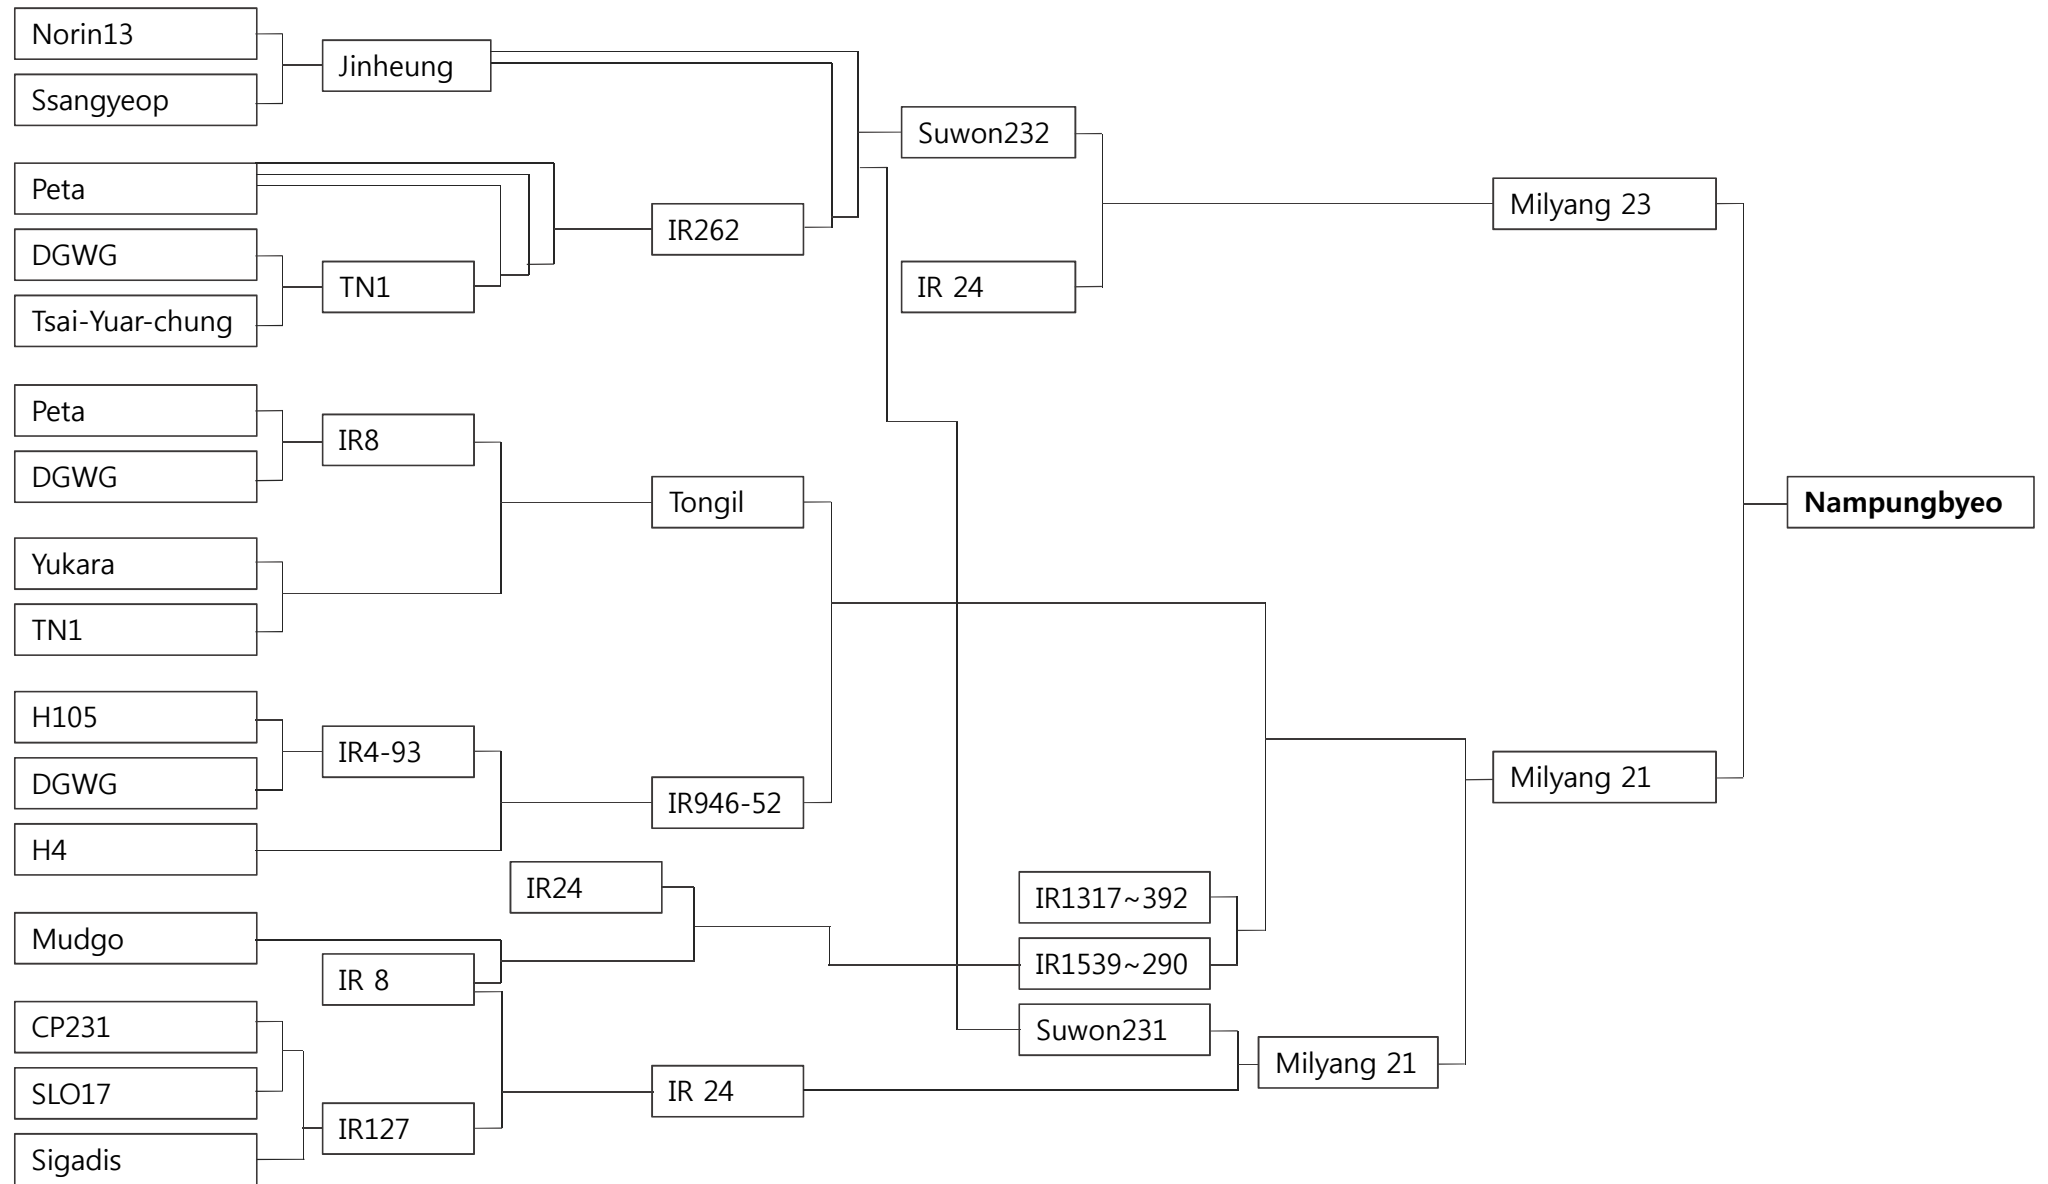

**F**

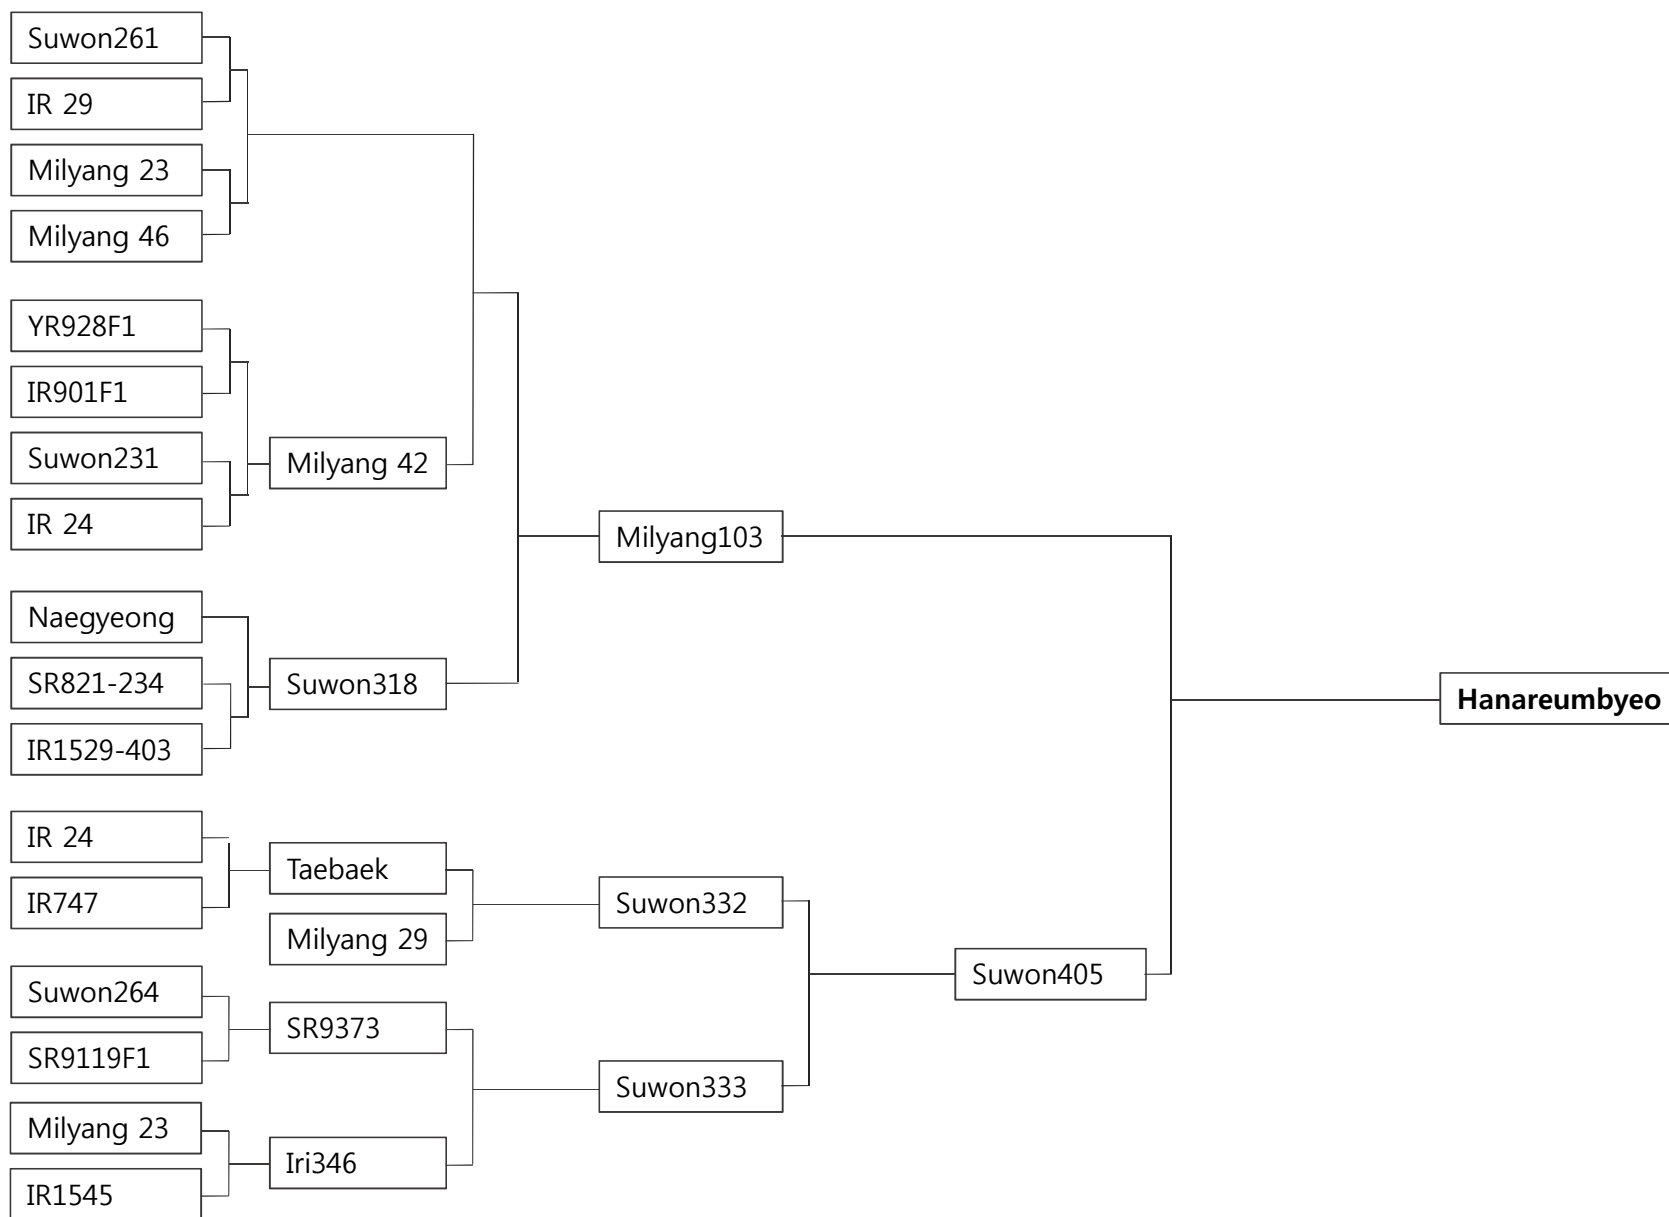

**G**

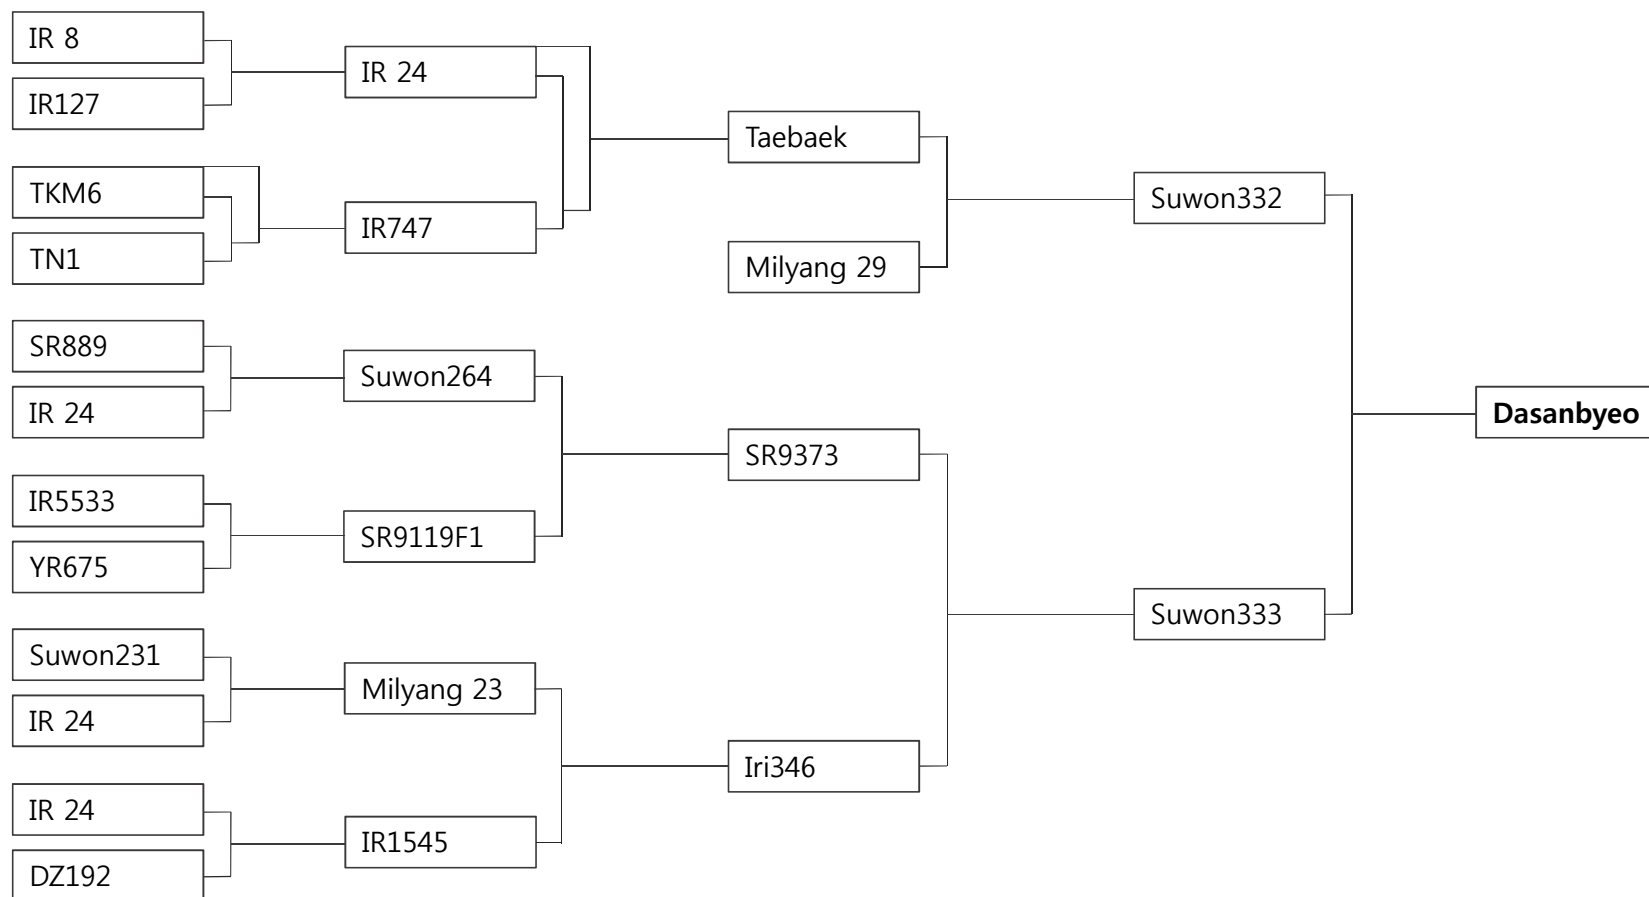

**H**

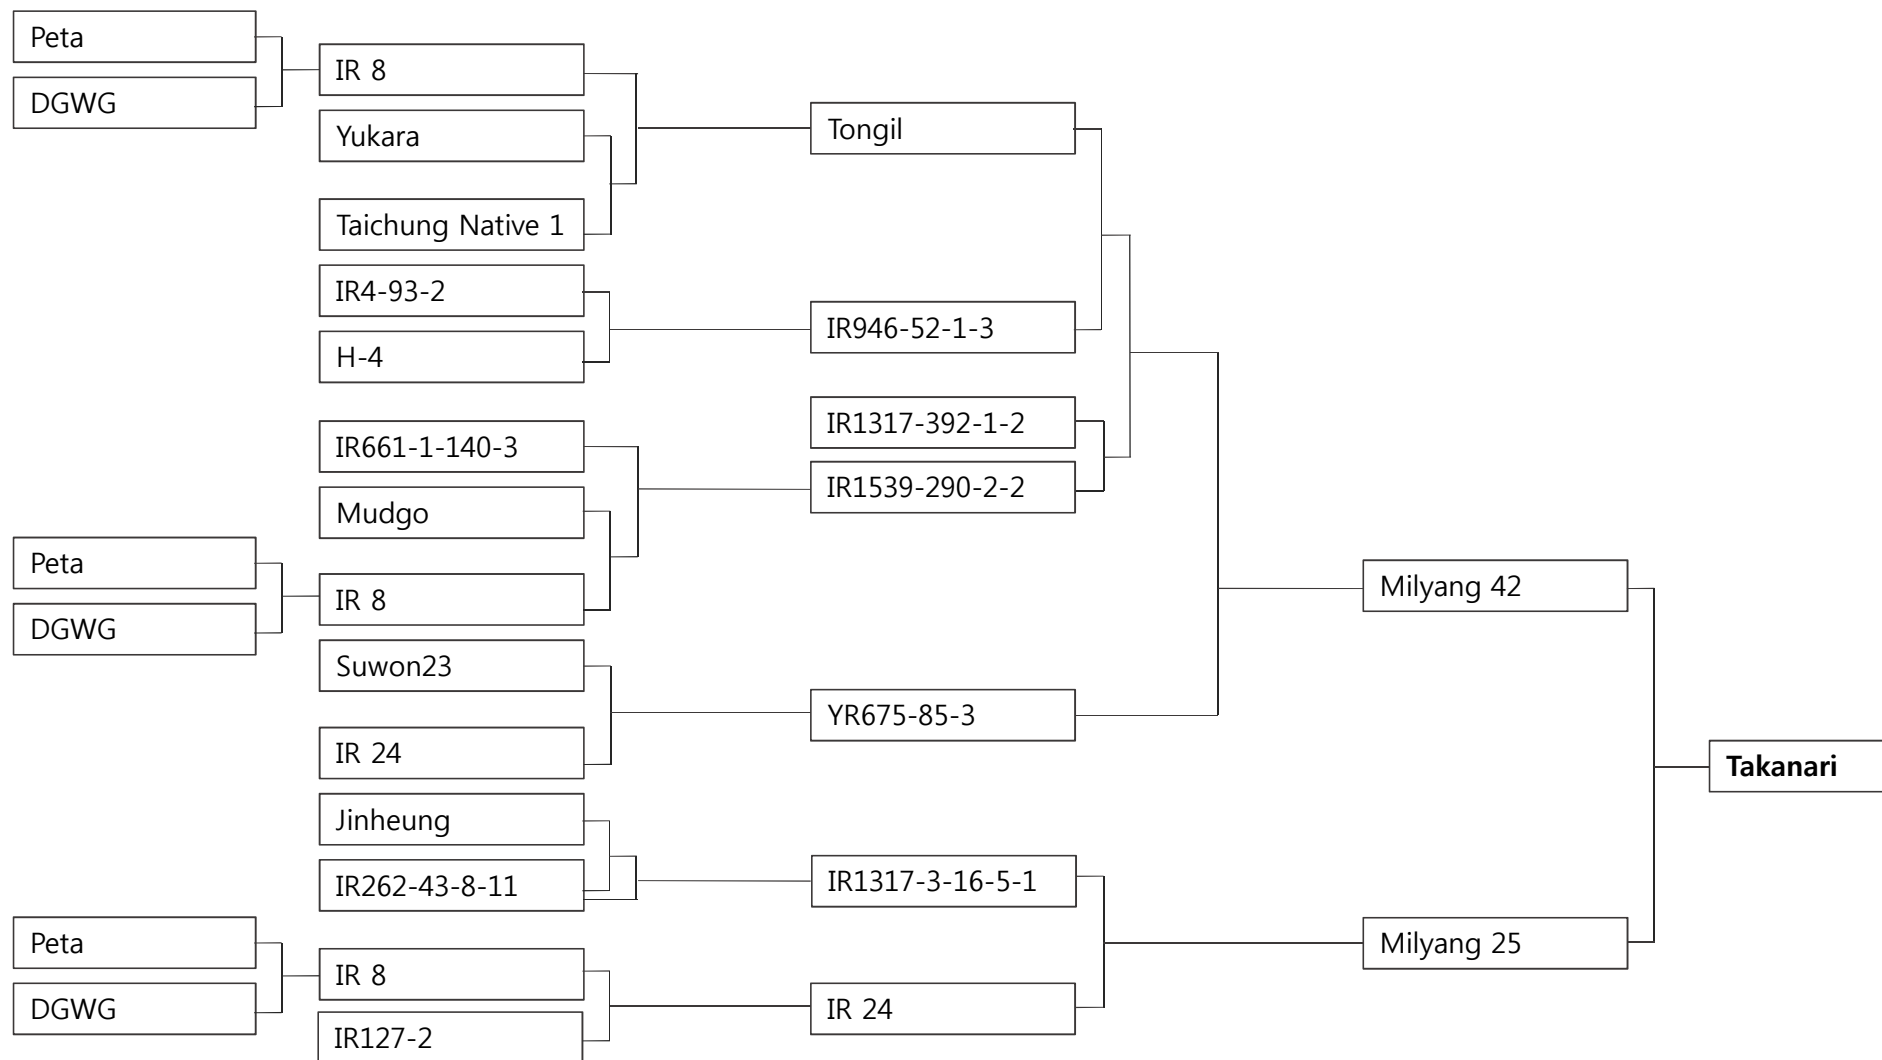

Supplement: Supplementary file 1 [file supplementary]
