# Supplementary material for: Characterization of the <em>Common japonica</em>-Originated Genomic Regions in the High Yielding Varieties Developed from Inter-Subspecific Crosses in Rice (<em>Oryza sativa</em> L.)
Source: Preprints.org preprint supplement (doi:10.20944/preprints202004.0428.v1), 2020-04-24
Supplement: Supplementary file 1 [file Table S1.xlsx]

## Sheet: Sheet1
Table S1. The list of 94 diverse rice germplasms used in this study. The order of germplasm is identical with oder in Figure 3. The varieties highlighted by yellow are eight HYVs used in this study.
Name	Origin	Subsgroup known by previous study [27] or literature review	Subgroup identified by in this study using 54 SNP markers
IR 8	Philippines	indica	IND1
TN1	Taiwan	indica
Dee Geo Woo Gen	Taiwan	indica
Guichow	China	indica
29-LU-1	China	indica
Chilseongbyeo	South Korea	Tongil-type
TW16	SNU	indica
Gayabyeo	South Korea	Tongil-type
Zenith	USA	indica
Ciherang	Indonesia	indica
IR64	Philippines	indica
Makassane	Mozambique	indica
SHP	SNU	indica
Hangangchalbyeo	South Korea	Tongil-type
Samgangbyeo	South Korea	Tongil-type
Takanari	Japan	indica
L201	SNU	tropical japonica
Zhenshan 97B	China	indica	IND2
Goryeong 13	South Korea	weedy rice
Tetep	Vietnam	indica
93-11	China	indica
Phaka Rumduol	Cambodia	indica
Utri Merah	Indonesia	indica
Matatag 1	Philippines	indica
NSIC Rc 222	Philippines	indica
NSIC Rc 238	Philippines	indica
Mogwoobyeo	South Korea	Tongil-type
Khao Hlan On	Myanmar	indica
Bina dhan 10	Bangladesh	indica
CR dhan 405	Bangladesh	indica
IR36	Philippines	indica
Swarna	India	indica
Kasalath	India	indica
Dular	India	aus
N22	India	aus
O.officinalis (IT145526)	IRRI	wild rice
Hyangmi 1	South Korea	Tongil-type	HYV
Anmibyeo	South Korea	Tongil-type
Namyeongbyeo	South Korea	Tongil-type
Cheongcheongbyeo	South Korea	indica /Tongil-type
3027	SNU	indica
IRBB61	Philippines	indica
IRBB23	Philippines	indica
IRBB66	Philippines	indica
IR24	Philippines	indica
Taebaekbyeo	South Korea	Tongil-type
Minghui 63	China	indica
Tongil	South Korea	indica /Tongil-type
Dasanbyeo	South Korea	indica /Tongil-type
Nampungbyeo	South Korea	indica /Tongil-type
Milyang 23	South Korea	indica /Tongil-type
Namcheonbyeo	South Korea	Tongil-type
Keunseombyeo	South Korea	Tongil-type
Hanareumbyeo	South Korea	indica /Tongil-type
Nonganbyeo	South Korea	admixture / Tongil-type
AddaySel	Philippines	admixture	JAP
Azucena	USA	tropical japonica
Dawn	USA	tropical japonica
Malagit Sinaguing	Philippines	tropical japonica
Jefferson	USA	tropical japonica
Lemont	USA	tropical japonica
Dobongbyeo	South Korea	temperate japonica
CP-SLO	Philippines	tropical japonica
HWC-line	SNU	tropical japonica
Nokyangbyeo	South Korea	admixture
TR22183	China	temperate japonica
Balila	Italy	temperate japonica
Odaebyeo	South Korea	temperate japonica
Joryeongbyeo	South Korea	temperate japonica
Hiami	South Korea	temperate japonica
Koshihikari	South Korea	temperate japonica
Yukara	Japan	temperate japonica
Samgwangbyeo	Japan	temperate japonica
Tong88-7	China	temperate japonica
Sindongjinbyeo	South Korea	temperate japonica
S201	SNU	temperate japonica
Hwacheongbyeo	South Korea	temperate japonica
Jinbaekbyeo	South Korea	temperate japonica
Andabyeo	South Korea	temperate japonica
Hopumbyeo	South Korea	temperate japonica
Jinheungbyeo	South Korea	temperate japonica
Kitaake	Japan	temperate japonica
MS 11	Philippines	temperate japonica
Nipponbare	Japan	temperate japonica
Samnambyeo	South Korea	temperate japonica
Sasanishiki	Japan	temperate japonica
Chucheongbyeo	South Korea	temperate japonica
Gihobyeo	South Korea	temperate japonica
Hwanseongbyeo	South Korea	temperate japonica
Ilpumbyeo	South Korea	temperate japonica
Singeumobyeo	South Korea	temperate japonica
Suwonjo	South Korea	temperate japonica
Namwon 1	South Korea	weedy rice
Norin 20	Japan	temperate japonica
Abbreviations are aS follow: SNU—Seoul National University, IRRI—International Rice Research Institute.
