# Supplementary material for: Characterization of the <em>Common japonica</em>-Originated Genomic Regions in the High Yielding Varieties Developed from Inter-Subspecific Crosses in Rice (<em>Oryza sativa</em> L.)
Source: Preprints.org preprint supplement (doi:10.20944/preprints202004.0428.v1), 2020-04-24
Supplement: Supplementary file 2 [file Table S2.xlsx]

## Sheet: Table S2
Table S2. The list of 54 Fluidigm SNP markers used in this study.
Chr	Marker ID	Position in IRGSP 1.0 (bp)	Ref	Alt	Status	Gene ID	AA	AA	ASP1 sequence	ASP2 sequence	LSP sequence	STA sequence	Remark
1	Os01g0328500	12648776	A	C	Non-synonymous	OS01G0328500	K	N	CCACAAATGATCAAGGCTCCAAA	CCACAAATGATCAAGGCTCCAAC	TTGTGCCTGCTTTTGGCCAT	GACTTTCACCAAGTAAGGCTTCC	Developed in this study
1	Os01g0329800	12728842	C	T	Non-synonymous	OS01G0329800	R	C	TTGGGCTAGCACTACCAATACG	TTTGGGCTAGCACTACCAATACA	GTGGGCTGCAGCAGAGAAA	CCATCCACGTTCGATAATTTCATCT
1	Os01g0337100	13215114	C	T	Non-synonymous	OS01G0337100	T	M	TCAAGGGCAAAGGATACTTCCG	TTCAAGGGCAAAGGATACTTCCA	CCTTGAGGGTGTGTTGGAATCAT	GCTTCAAGGGCAAAGGATACT
1	Os01g0347000	13797351	T	A	Non-synonymous	OS01G0347000	L	Q	CTTTACCAGAAGCTGGATGGTCT	CTTTACCAGAAGCTGGATGGTCA	TCCCTGTCATATTCATTTAATACTTTATACATAAGATTGA	TCACACTTTACCAGAAGCTGGA
1	Os01g0351200	14049105	G	A	Non-synonymous	PARP2-A	G	R	CCACCATGAACCAGACTAATGTTG	GCCACCATGAACCAGACTAATGTTA	TTTCAACCGGTCAGAGAGAGATGG	GGTGATGAGATCTATGATGCCAC
1	Os01g0356800	14423622	G	T	Non-synonymous	OS01G0356800	V	L	GGGTTCATCGGAGGAGAGG	GGGTTCATCGGAGGAGAGT	TCCTCTGCCCCTAATGTCACTAAATTC	AGATGAAGAAGAGATAGAAGTTGATCATCTTA
1	Os01g0363900	14819183	A	G	Non-synonymous	OS01G0363900	H	R	AAATTGGCTGTCAGCAAACATGT	TTGGCTGTCAGCAAACATGC	ACTTGTCTGACCCATCTGGCTT	TGTGATGTTGTGATAAATTGACCACAT
1	Os01g0364400	14877765	A	C	Non-synonymous	OS01G0364400	Y	D	TGTTGCATCTACTTCGGCGT	TGTTGCATCTACTTCGGCGG	CGCTATTGTACAGTTTGGTTGGTCT	CTCCGATGAGATAAATGAAACCACT
1	Os01g0367100	14997670	T	A	Non-synonymous	OS01G0367100	D	V	GCCATCTTGACCCCTGTATCAT	GCCATCTTGACCCCTGTATCAA	CTTCCAATCCAGGGGTGTCT	CCAACAATGTCGGAGCCAG
1	Os01g0369200	15149966	A	G	Non-synonymous	OS01G0369200	D	G	AGGAGTGTCATAGAGCTCCATGA	GGAGTGTCATAGAGCTCCATGG	TGCTCTGGAAACAGTTGGTGACA	ACCACCGATTTTAGGATTTTGTGAG
1	Os01g0370000	15194266	C	T	Non-synonymous	OPR9	R	Q	ACTGAATCAGGGGTAAATGACCG	AACTGAATCAGGGGTAAATGACCA	GGCGTGACATGAACCACCATT	GCTACAGATGGTGTCAAAGCAA
1	Os01g0371200	15281603	G	A	Non-synonymous	GSTF1	A	V	GCACCTTCTTCAGCTTCTCCG	GCACCTTCTTCAGCTTCTCCA	GCGTGGGATCCCAACTAACCA	TGCCTCGTACACCTCCAG
1	Os01g0371400	15290938	T	G	Non-synonymous	OS01G0371400	S	A	TGCTGAAGGAAAGCAACCTCT	GCTGAAGGAAAGCAACCTCG	TTCGAGCCACACATCGACCA	CGCAAAAGCGCATCAGACT
1	Os01g0371500	15294068	C	A	Non-synonymous	OS01G0371500	F	L	GCTTGGCAGATATCAGCCATTTC	AGCTTGGCAGATATCAGCCATTTA	GGCAGATGCCAGCAGGTAAT	CAAATCCAAGTACTTAGCCGGG
1	Os01g0375100	15475452	A	G	Non-synonymous	OS01G0375100	M	T	AGGTGCGCTGAAAGAAAATTTGAT	AGGTGCGCTGAAAGAAAATTTGAC	ACTGGGGTTCGTTCAAGGGA	ATGATTTCACTGGATATGAGCAAGG
2	Os02g0713500	29556620	A	G	Non-synonymous	OS02G0713500	S	P	TTCACTATTAAAATCTAAAGTCAGATCTCTTATAGA	TTCACTATTAAAATCTAAAGTCAGATCTCTTATAGG	GCACAATGCGGTGAAGTTGAGC	CCTTTTCACTATTAAAATCTAAAGTCAGATCTCT
2	Os02g0713900	29589789	T	C	Non-synonymous	OS02G0713900	N	D	GCCCATATATGCAACCCATAGAGTT	GCCCATATATGCAACCCATAGAGTC	GGCAGCTAGAACCATCTACCCA	GGAACCATGACACTTGCCC
2	Os02g0743700	31190783	A	G	5' UTR	OS02G0743700	-	-	CCAAGCTTTGCTTTTCTTTTCGCT	CAAGCTTTGCTTTTCTTTTCGCC	CATCATCACGAGTCGCCTGC	CGTGAAGTGAAGCTCTCTCCA
2	Os02g0755200	31773877	T	C	Non-synonymous	OS02G0755200	N	S	TCACCCTCCATTGCAGCTAAAT	CACCCTCCATTGCAGCTAAAC	TCTGGCTCGCTTTTCCTCTATGG	CAGTGTACTCAATCGTTGCTCAT
2	Os02g0761100	32050246	A	T	Non-synonymous	OS02G0761100	D	V	CATCACTGAAAAAGTTCACAACTCCAT	CATCACTGAAAAAGTTCACAACTCCAA	GGAGAACTACCAGAAGGTGCCA	CAATCAGGATACATGTCACCATCAC
3	Os03g0114900	848413	A	G	3' UTR	OS03G0114900	-	-	CAGGAGAGCAAAACGAAGAAATGA	CAGGAGAGCAAAACGAAGAAATGG	TCTGCTGTGATAAGAAATGGTCGAATCAA	CGAGAAGAAAACCCTTCTCCAAT
3	Os03g0115500	880866	A	G	3' UTR	OS03G0115500	-	-	CCTTTTCAGGTAGGAACCAACACA	CTTTTCAGGTAGGAACCAACACG	GGGAAACAAAAAAGATAAACTAGTTTATCTGGACA	CTCAAGTTCCCTTATAAACACCTGA
4	Os04g0395900	19499077	A	G	3' UTR	OS04G0395900	-	-	CACATCTTGAATGGCTTGAGCT	CACATCTTGAATGGCTTGAGCC	TGACCTGCTGTTCTGCCGT	TGGCCTACTGAAGTAGCTTCC
4	Os04g0400800	19826412	C	T	3' UTR	OS04G0400800	-	-	TCTATAATTGACATATTTCATATGTAATTAAAGTCG	TCTATAATTGACATATTTCATATGTAATTAAAGTCA	CATAAGGGCTGATGTTTAGAGTCCAAAA	TGGCACGTATATGTAATTTGTTTTGTCT
5	Os05g0563400	28038491	C	T	Non-synonymous	ARF15	L	F	CAGTATCCTAGGGGTTCCAAGAC	ACAGTATCCTAGGGGTTCCAAGAT	CTGGGTTTCCAAGTGGTGCT	GCGATGCGAGTAACAGTATCCT
5	Os05g0571700	28490961	C	C	Non-synonymous	OS05G0571700	G	D	GAGTTCCAACCGCTCCAAAC	TGAGTTCCAACCGCTCCAAAT	GAAAACGAGCTAAGGTGCCTTC	ACGTACTGCAGTGCCTGA
6	Os06g0125132	1358664	G	T	Non-synonymous	SDH8B	Q	H	TCTTTCCGGTGAAGGCCAG	ATCTTTCCGGTGAAGGCCAT	CTTGCCCATCGCCGCT	TGGCAGGAGAAGTTCCAGAA
6	Os06g0128300	1493194	G	A	Non-synonymous	OS06G0128300	A	V	CCATCGATGCTGCCGC	GCCATCGATGCTGCCGT	AGGGAATTATGTATATAGTCTATGAAACCTCTAAGCT	TCACAGCAGAATAACAGTGATGC
6	Os06g0129900	1582360	T	C	Non-synonymous	OS06G0129900	H	R	CTCCATATCGACAATGGTCTCCA	CTCCATATCGACAATGGTCTCCG	AATTTCTCGAGGGTTTGCAAGCAG	AGGAGCCAATCTATAAAACAATGTTCA
6	Os06g0130000	1595529	G	T	Non-synonymous	OS06G0130000	L	F	TCATGGCAGCTTCCTCACAC	TCATGGCAGCTTCCTCACAA	CCGGGAGTGATCTGAGAGCAT	TGAGAATATTTTGTGGACCAAGCTC
6	Os06g0130100	1610458	A	G	Non-synonymous	OS06G0130100	I	V	TTCTATTGCAGTTAATATTTCAAAGACAGCAA	TCTATTGCAGTTAATATTTCAAAGACAGCAG	CAACAGCAGAACGCAGAGCA	CTTTTCTGCTAAACACATGTTCACT
6	Os06g0130400	1633040	A	G	Non-synonymous	OS06G0130400	H	R	CGATTACAGATAGCCATAAACCGAATCA	GATTACAGATAGCCATAAACCGAATCG	CATTCCATGACAAGCTCGAGAGGA	GCAAAGGCTCAGGACGATTAC
6	Os06g0131100	1650488	G	A	Non-synonymous	OS06G0131100	A	T	ACACAATCTGGCTTGATCTCCG	ACACAATCTGGCTTGATCTCCA	CGTTCTTCAGTAACTGTGCTTTGTGA	TCAACATGTTCTACATGCTGCAC
6	Os06g0136800	1952519	A	G	Non-synonymous	OS06G0136800	S	G	TGTGTGCTCTGACAACTTGCT	GTGTGCTCTGACAACTTGCC	TGAAGCAAATGAACTTATTAGGATCAAGAACTATCT	TCTTACCTTATCAACAGGATGACCT
7	Os07g0677500	28689079	G	A	Non-synonymous	OS07G0677500	A	T	GGTCTGATTGCACACGGC	CGGTCTGATTGCACACGGT	AGAGGCTACGGCGTCATCG	GATGTCGGCGCATGAGA
9	Os09g0471600	17989472	T	C	Non-synonymous	OS09G0471600	K	R	GCGTAGGAAGTGGTTTTGCTTT	GCGTAGGAAGTGGTTTTGCTTC	TCCAGTTGTGTTGGACTGGGT	CAGATGCTGTTTGTACTAACACAAG
9	Os09g0471800	18007691	C	A	Non-synonymous	OS09G0471800	R	M	GGTGAAGGCGTACATGTCCAG	GGTGAAGGCGTACATGTCCAT	GTATGACATACCGCCCGTGGA	CATGGAAGACGGCAAGGT
11	Os11g0592500	22535715	A	T	Non-synonymous	OS11G0592500	S	C	CTTGGTGGCAATCGTGTTAAAATACT	CTTGGTGGCAATCGTGTTAAAATACA	TAGTGGCTTACCGCTCATGATG	AACATTCCATTGCTCTGTGCT
1	Rd-GA	25383230	G	A	Non-synonymous	Os01G0633500	V	I	TCCACGGTGGGCTTGAC	TTCCACGGTGGGCTTGAT	ACGCCCATGGACTTCGAGT	GCATGATGCTCAGCATCCC	Indica-japonica SNP set 2 [27]
1	qSH1-TG	36461792	T	G	Intergenic	-	-	-	GCATTTGGTGGTACGTGTATCATGA	CATTTGGTGGTACGTGTATCATGC	AGGGTTCGGCGATGATGGT	CCATCTCGTCCAAAGATCCTTAG
1	SD1-GA	38384401	G	A	Intron	Os01G0883800	-	-	CATGCCAAGCCAAGATATGGG	CCATGCCAAGCCAAGATATGGA	CCAACGAGGAGGAGAACGCA	ACCAGACTCGGTCATGCC
3	GS3-CA	16733441	G	T	Stop gained	OS03G0407400	C	*	CTGCCTCCAGATGCTGC	GCTGCCTCCAGATGCTGA	ACAGCAGGCTGGCTTACTCT	AAATTCAATCGAAGGGATCCACG
3	Hd6-AT	31512460	A	T	Stop lost	OS03G0762000	*	K	TGTGGAGGTCCAAACATTGTGT	TGTGGAGGTCCAAACATTGTGA	CTAGGAGTCTTAGAATGTTGATCTCTGACA	CAGAATCTTTGTGGAGGTCCAA
5	GS5-GA	3444069	G	A	Upstream	OS05G0158500	-	-	GCGTGCCAATATTCCTGTAGTG	ATGCGTGCCAATATTCCTGTAGTA	TGCGGAACGCAGCCTAACTA	ATTATTTTTTGAACATGCGTGCCAA
5	qSW5-AG	5361396	A	G	Upstream	Os05G0187500	-	-	GGATACATGTGTGCGAGTGCA	GATACATGTGTGCGAGTGCG	GGGAAGAACAGGGCCACG	GTCAACCGATGAGGTTGTACTTT
6	GS6-TG	1465866	T	G	3' UTR	OS06G0127800	-	-	GCTTCTTTTGTTAATGATGATTAGTTCATACAGTA	GCTTCTTTTGTTAATGATGATTAGTTCATACAGTC	CACCTTTCTTTCTTCTTTCTTTTCTCTGAATGT	GTGCTTCTTTTGTTAATGATGATTAGTTCA
6	WAXY-TG	1765761	T	G	Splice site donor	WAXY	-	-	TCATCAGGAAGAACATCTGCAAGT	CATCAGGAAGAACATCTGCAAGG	TCGATCTGAATAAGAGGGGAAACAAAGAAT	TGCTTGTGTTGTTCTGTTGTTCA
6	S5-TC	5761511	T	C	Non-synonymous	Os06t0213100	V	A	TGAGGAATAATCGACGATCAGCAAA	TGAGGAATAATCGACGATCAGCAAG	CCAGGGGAAACAATTCGGCTT	CGCAAGCTATAAGATATCATAGGATGAG
8	GW8-AG	26502275	A	G	Intron	Os08G0531600	-	-	ATCTAAAGGCGAGCAAAGAGGT	CTAAAGGCGAGCAAAGAGGC	TCCTTTAGCTCGGCAACTCGT	GATGATAGTAATAAATCTAAAGGCGAGCA
9	TAC1-CT	20731844	C	T	3' UTR	OS09G0529300	-	-	AGAAATTCCCTTTCACCTTTTGCG	AAGAAATTCCCTTTCACCTTTTGCA	AGCGTGAGGATGGATCCAACA	CAATACGTCTTGATCAGGAACTGAC
2	GRF4	28867788	G	A	Upstream	GRF4	-	-	CTAAGTTTAGTTTCAAACTTTTCCTTCAAACT	CTAAGTTTAGTTTCAAACTTTTCCTTCAAACA	GTAGGAAAGTTTTAATGTGATAAAAAAGCTGT	TGACCTACGGTTGCATGTCT	Developed in previous study [33]
3	GIF1	30048495	G	A	Synonymous	OS03G0733600	T	T	GGATATGCTTCCCCTACCACC	GGATATGCTTCCCCTACCACT	AGGGGATCATGACCTGCTGAAT	GAACCAGGGCATGATGGG
4	NAL1	31212801	A	G	Non-synonymous	NAL1	H	R	CAAGTCAACCGCGACATGAT	CAAGTCAACCGCGACATGAC	CGGCGCACTGGCAACA	AACATCTTCTGATTAGGGTAGTCCA
7	Ghd7	9154456	G	C	Non-synonymous	OS07G0261200	P	A	ACGTCTCCCTCGGCGA	CGTCTCCCTCGGCGG	CGAGCCCGGCGTCCA	GCGGGCTCACGTTCGA
Abbreviations are as follow: Chr - Chromosome, Ref - Reference allele, Alt - Alternative allele, AA - Amino acid.
